# Supplementary material for: Influence of CeO2 support morphology on the structural and NO2−RR performance of CeO2@Au catalyst
Source: Royal Society of Chemistry journal article supplement (doi:10.1039/d4qm00798k), 2024-11-07
Supplement: d4qm00798k1.pdf [file d4qm00798k1.pdf]

## Supplementary Information

### Influence of CeO<sub>2</sub> Support Morphology on the Structural and NO<sub>2</sub>-RR Performance of CeO<sub>2</sub>@Au Catalyst

Jin Li<sup>a</sup>, Wei Zhang<sup>a</sup>, Renliang Lyu<sup>a</sup>, Xiujing Xing<sup>b</sup>, Yaokang Lv<sup>c</sup>, Wei Xiong<sup>a,\*</sup>, and Hao Li<sup>d,\*</sup>

<sup>a</sup> Key Laboratory of Novel Biomass-Based Environmental and Energy Materials in Petroleum and Chemical Industry, Key Laboratory of Green Chemical Engineering Process of Ministry of Education, Hubei Key Laboratory of Novel Reactor & Green Chemical Technology, School of Chemistry and Environmental Engineering, Wuhan Institute of Technology, Wuhan 430205, China

<sup>b</sup> Chemistry Department, University of California, Davis, California 95616, United States

<sup>c</sup> College of Chemical Engineering, Zhejiang University of Technology, Hangzhou, 310014 P. R. China

<sup>d</sup> Advanced Institute for Materials Research (WPI-AIMR), Tohoku University, Sendai 980-8577, Japan

---

\*Corresponding author

E-mail address: xiongwei@wit.edu.cn (W. X.); li.hao.b8@tohoku.ac.jp (H. L.)

Tel/Fax: +86-27-87195001; +81-080-9363-8256

## 1. Detection of the product ammonia

In this study, the concentration of the product ammonia was detected by the indophenol blue method<sup>[1]</sup>, which was carried out as follows: 2.0 mL of diluted electrolyte solution was taken in a colorimetric tube, followed by the addition of 2.0 mL of oxidising agent, 1.0 mL of NaClO, and 0.2 mL of 1 wt.% sodium nitroprusside solution in that order, and the mixture was placed in the dark and left to stand for 1 h. At the end of the standing period, the mixture was analyzed by ultraviolet (UV) test. In this paper, by calibrating the concentration absorbance curves using standard NH<sub>2</sub>SO<sub>4</sub> solutions of 0 μg mL<sup>-1</sup>, 0.2 μg mL<sup>-1</sup>, 0.5 μg mL<sup>-1</sup>, 1.0 μg mL<sup>-1</sup>, 2.0 μg mL<sup>-1</sup>, and 5.0 μg mL<sup>-1</sup> as shown in **Fig. S1a-b**, the standard curves we fitted ( $A = 0.4567 C + 0.0237$  with  $R^2 = 0.999$ ) with good linearity. The ammonia yield and Faraday efficiency were calculated as follows:

$$\text{NH}_3 \text{ yield rate} = ([\text{NH}_3] \times V) / (t \times m) \quad (1)$$

$$\text{FE} = (6 \times F \times [\text{NH}_3] \times V) / (M \times Q) \times 100\% \quad (2)$$

In this formula, [NH<sub>3</sub>] is the concentration of ammonia, V is the volume of the electrolyte, t is the electrolysis time, m is the mass of the catalyst, F is Faraday's constant, M is the relative molecular mass of NH<sub>3</sub>, and Q is the amount of Coulomb that passes through the electrode during electrolysis.

## 2. Detection of hydrazine

The concentration of the by-product hydrazine (N<sub>2</sub>H<sub>4</sub>) was examined in this study using the Watt-Chrisp method<sup>[2]</sup>. Take 5.0 mL of electrolyte after electrolysis in the cuvette, add 5.0 mL of freshly prepared colour developer (consisting of a mixture of 5.99 g of

p-dimethylaminobenzaldehyde, 300 mL of ethanol, 30 mL of hydrochloric acid (36%)) to form a mixed solution, and place it in a dark environment to stand for 20 min. At the end of the stationary period, the mixture was analysed by UV detection. In this paper, hydrazine hydrochloride and 0.1 M PBS solution were used as standards and solvents to prepare solutions with  $N_2H_4$  concentrations of 0.0  $\mu\text{g mL}$ , 0.2  $\mu\text{g mL}$ , 0.4  $\mu\text{g mL}$ , 0.6  $\mu\text{g mL}$ , 0.8  $\mu\text{g mL}$ , and 1.0  $\mu\text{g mL}$ , respectively, and the absorbance of each solution was measured by using the above mentioned Watt-Chrisp method as shown in **Fig. S1c-d**. As shown, the fitted curves ( $A = 1.1194 C + 0.0716$ ,  $R^2 = 0.999$ ) were calculated and there was a good linear relationship between  $N_2H_4$  concentration and absorbance.

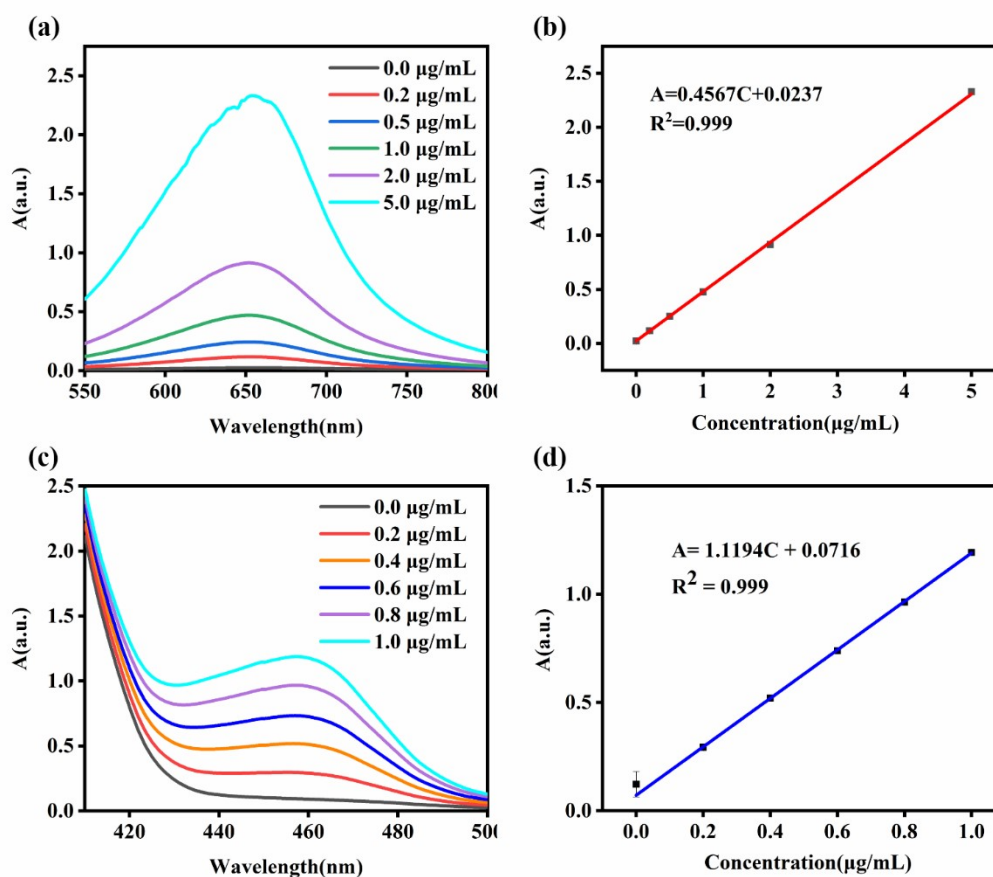

**Figure S1.** (a) UV absorption spectra at different  $NH_3$  concentrations and (b) Ammonia nitrogen standard curve; (c) UV-Vis absorption spectra of different concentrations of  $N_2H_4$  and (d) Standard curve of  $N_2H_4$ .

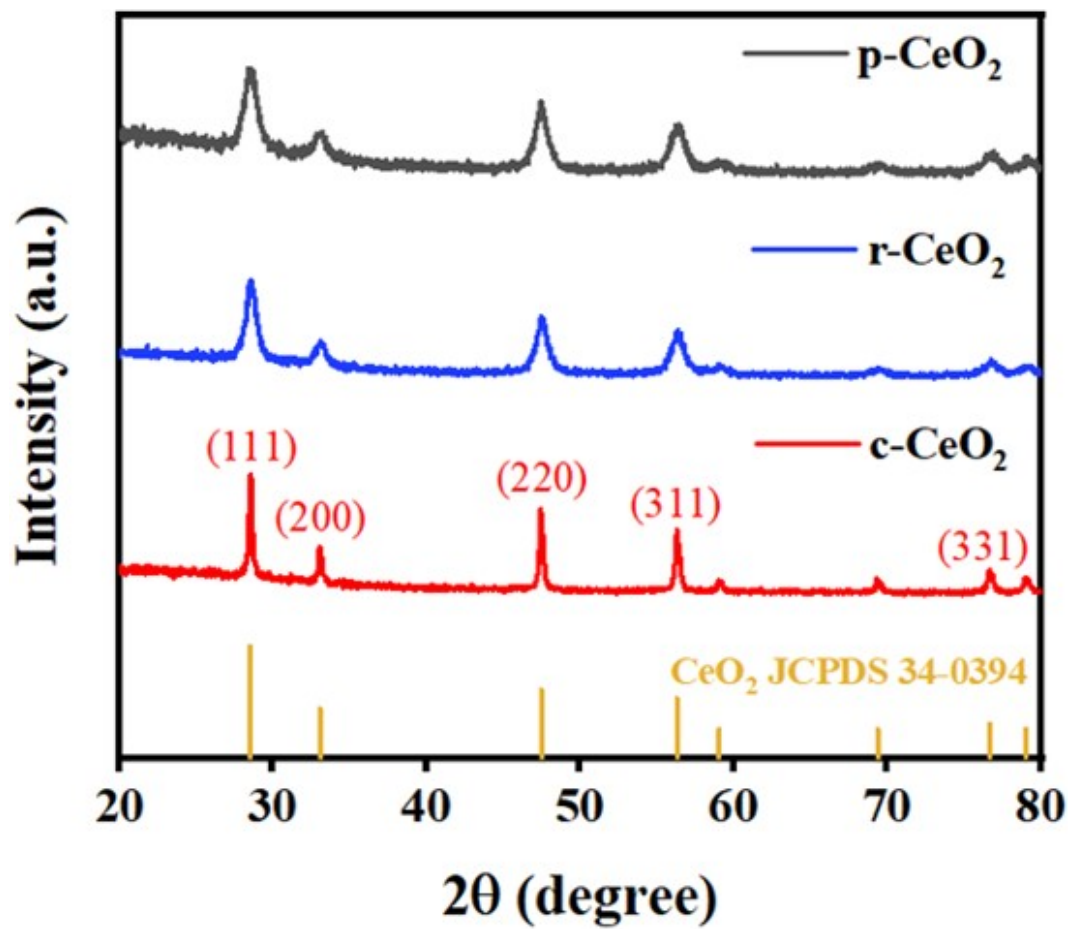

Figure S2. XRD plots of c-CeO<sub>2</sub>, r-CeO<sub>2</sub> and p-CeO<sub>2</sub>.

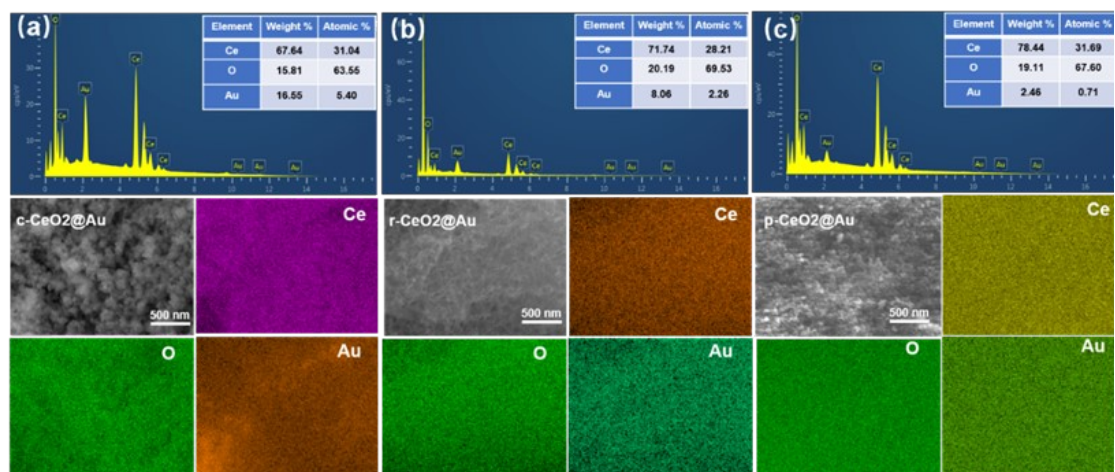

**Figure S3.** EDS plots of (a) c- CeO<sub>2</sub>@Au, (b) r-CeO<sub>2</sub>@Au and (c) p-CeO<sub>2</sub>@Au.

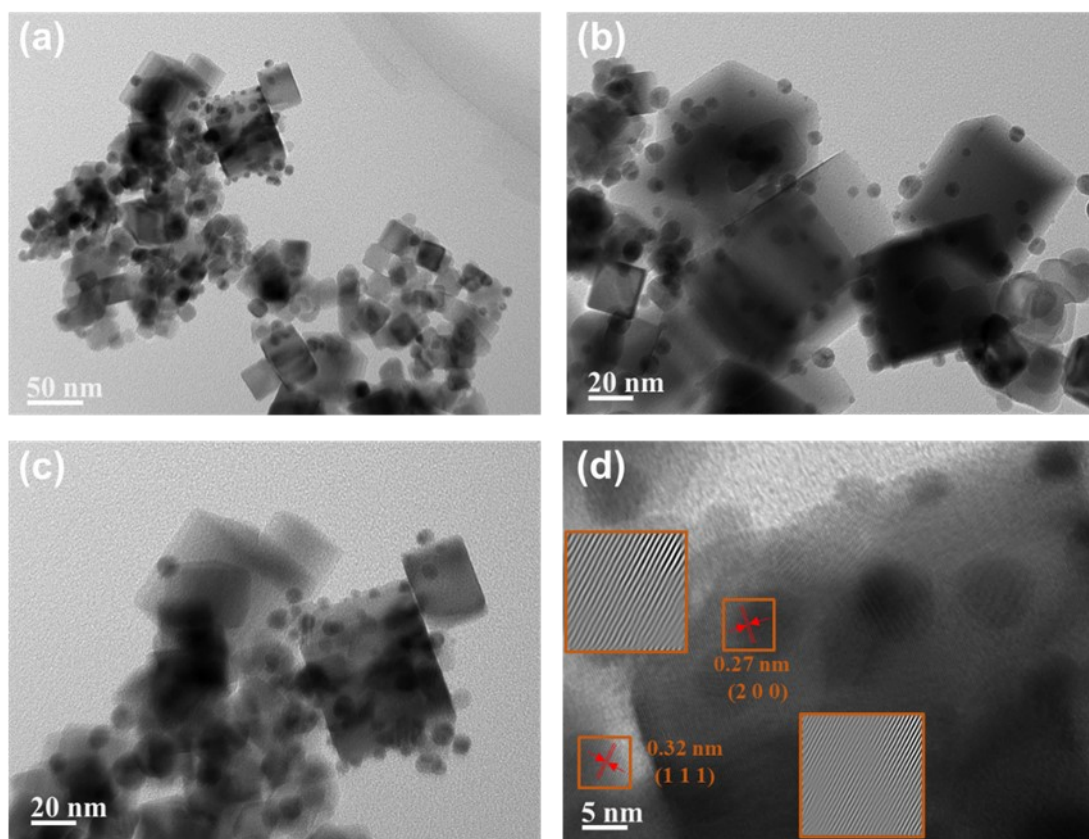

**Figure S4.** (a-c) TEM maps of c-CeO<sub>2</sub>@Au; (d) HR-TEM analysis of c-CeO<sub>2</sub>@Au.

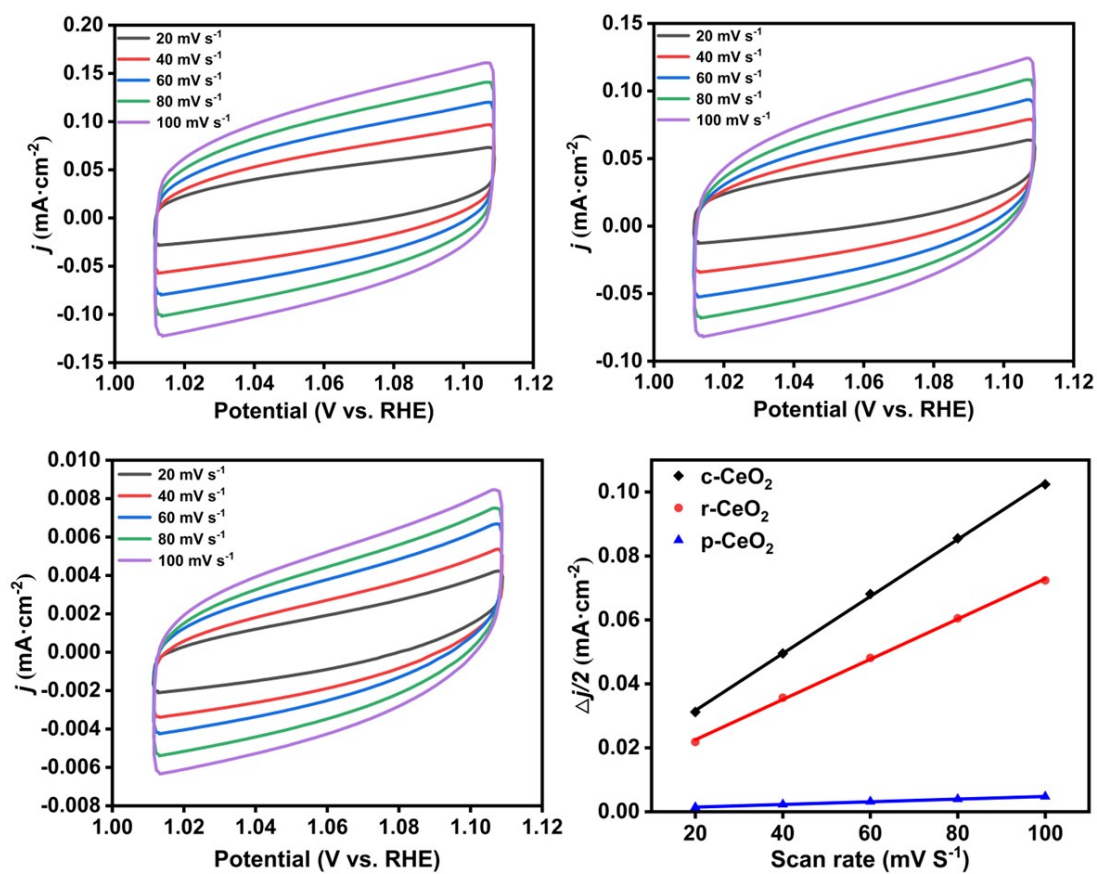

**Figure S5.** CV curves of (a) c-CeO<sub>2</sub>, (b) r-CeO<sub>2</sub> and (c) p-CeO<sub>2</sub> at different scanning rates; (d) plots of current density versus scanning rate.

**Table S1.** ICP testing of c-CeO<sub>2</sub>@Au, r-CeO<sub>2</sub>@Au and p-CeO<sub>2</sub>@Au.

| Materials               | Elements | content (%) |
|-------------------------|----------|-------------|
| c- CeO <sub>2</sub> @Au | Au       | 38.88 %     |
| r-CeO <sub>2</sub> @Au  | Au       | 35.99 %     |
| p-CeO <sub>2</sub> @Au  | Au       | 19.88 %     |



## References

- [1] D Zhu, L Zhang, RE Ruther, RJ Hamers, Photo-illuminated diamond as a solid-state source of solvated electrons in water for nitrogen reduction, *Nature materials.*, 2013, **12**, 836-841.
- [2] Watt G W, Chrisp J D, Spectrophotometric method for determination of hydrazine, *Analytical Chemistry.*, 1952, **24**, 2006-2008.
